# Supplementary material for: Static magnetic field enhances the bone remodelling capacity of human demineralized bone matrix in a rat animal model of cranial bone defects
Source: Royal Society of Chemistry journal article supplement (doi:10.1039/d3tb02299d), 2024-01-01
Supplement: d3tb02299d1.pdf [file d3tb02299d1.pdf]

## Static magnetic field enhances bone remodelling capacity of human demineralized bone matrix in rat animal model of cranial bone defect

SeyedJamal Hosseini,<sup>ab†</sup> Houman Parsaie,<sup>ct</sup> MirJavad Moosavifar,<sup>abd</sup> Narjes Tavakoli,<sup>e</sup> Reza Ahadi,<sup>f</sup> and Kaveh Roshanbinfar <sup>\*g</sup>

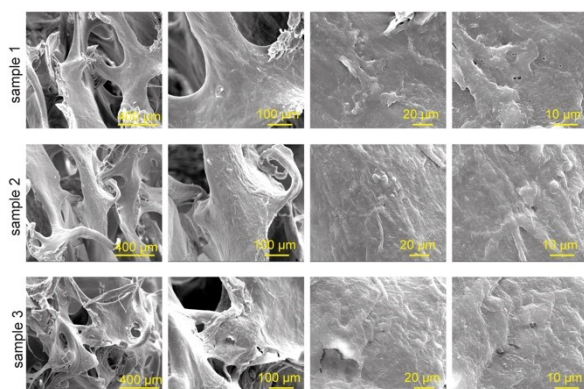

**Figure S1. Reproducible generation of demineralized bone matrix.** Representative examples of scanning electron microscopy images of three independent samples of demineralized bone matrices showing similar microstructure at different levels.
